# Supplementary material for: Loads of Coliforms and Fecal Coliforms and Characterization of Thermotolerant Escherichia coli in Fresh Raw Milk Cheese
Source: MDPI journal article supplement (doi:10.3390/foods11030332), 2022-01-25
Supplement: s1 [file s1]

Supplementary Table S1. Primers used for PCR

| Primer                                                | Target                      | Sequence 5'--3'         | Reference |
|-------------------------------------------------------|-----------------------------|-------------------------|-----------|
| <b>1- <math>\beta</math>-Lactamases</b>               |                             |                         |           |
| TEM-F                                                 | <i>bla</i> <sub>TEM</sub>   | ATAAAATTCTTGAAGACGAAA   | [1]       |
| TEM-R                                                 |                             | GACAGTTACCAATGCTTAATC   |           |
| SHV-F                                                 | <i>bla</i> <sub>SHV</sub>   | TTATCTCCCTGTTAGCCACC    | [1]       |
| SHV-R                                                 |                             | GATTTGCTGATTTTCGCTCGG   |           |
| OXA-F                                                 | <i>bla</i> <sub>OXA</sub>   | TCAACTTTCAAGATCGCA      | [2]       |
| OXA-R                                                 |                             | GTGTGTTTAGAATGGTGA      |           |
| CTX-M-F                                               | <i>bla</i> <sub>CTX-M</sub> | CGCTTTCGATGTGCAG        | [3]       |
| CTX-M-R                                               |                             | ACCGCGATATCGTTGGT       |           |
| CMY-F                                                 | <i>bla</i> <sub>CMY</sub>   | GACAGCCTCTTCTCCACA      | [4]       |
| CMY-R                                                 |                             | TGGAACGAAGGCTACGTA      |           |
| OXY-F                                                 | <i>bla</i> <sub>OXY</sub>   | GTTTGGTAACTGTGACGGG     | [5]       |
| OXY-R                                                 |                             | AGAGTGCAGAGTGTTCAG      |           |
| <b>2- Plasmid-mediated quinolone resistance genes</b> |                             |                         |           |
| qnrA-F                                                | <i>qnrA</i>                 | ATTTCTCACGCCAGGATTG     | [6]       |
| qnrA-R                                                |                             | GATCGGCAAAGGTTAGGTCA    |           |
| qnrB-F                                                | <i>qnrB</i>                 | GATCGTGAAAGCCAGAAAGG    | [6]       |
| qnrB-R                                                |                             | ACGATGCCTGGTAGTTGTCC    |           |
| qnrS-F                                                | <i>qnrS</i>                 | ACGACATTCGTCAACTGCAA    | [6]       |
| qnrS-R                                                |                             | TAAATTGGCACCCCTGTAGGC   |           |
| aac(6')-Ib-F                                          | <i>aac(6')-Ib</i>           | TTGCGATGCTCTATGAGTGGCTA | [7]       |
| aac(6')-Ib-R                                          |                             | CTCGAATGCCTGGCGTGTTC    |           |
| <b>3- Tetracyclines</b>                               |                             |                         |           |
| <i>tet</i> (A)-F                                      | <i>tet</i> (A)              | GCTACATCCTGCTTGCCTTC    | [8]       |
| <i>tet</i> (A)-R                                      |                             | CATAGATCGCCGTGAAGAGG    |           |
| <i>tet</i> (B)-F                                      | <i>tet</i> (B)              | TTGGTTAGGGGCAAGTTTTG    | [8]       |
| <i>tet</i> (B)-R                                      |                             | GTAATGGGGCCAATAACACCG   |           |
| <i>tet</i> (C)-F                                      | <i>tet</i> (C)              | CTTGAGAGCCTTCAACCCAG    | [8]       |
| <i>tet</i> (C)-R                                      |                             | ATGGTCGTCATCTACCTGCC    |           |
| <i>tet</i> (D)-F                                      | <i>tet</i> (D)              | AAACCATTACGGCATTCTGC    | [8]       |
| <i>tet</i> (D)-R                                      |                             | GACCGGATACACCATCCATC    |           |
| <i>tet</i> (E)-F                                      | <i>tet</i> (E)              | AAACCACATCCTCCATACGC    | [8]       |
| <i>tet</i> (E)-R                                      |                             | AAATAGGCCACAACCGTCAG    |           |
| <b>4- Phylogenetic group</b>                          |                             |                         |           |
| ChuA.1b                                               | <i>chuA</i>                 | ATGGTACCGGACGAACCAAC    | [9]       |
| ChuA.2.2                                              |                             | TGCCGCCAGTACCAAAGACA    |           |
| YjaA.1b                                               | <i>yjaA</i>                 | CAAACGTGAAGTGTCAAGGAG   | [9]       |
| YjaA.2b                                               |                             | AATGCGTTCCTCAACCTGTG    |           |
| TspE4C2.1b                                            | <i>tspE4C</i>               | CACTATTCGTAAGGTCATCC    | [9]       |
| TspE4C2b                                              |                             | AGTTTATCGCTGCGGGTCGC    |           |
| AceK.f                                                | <i>arpA</i>                 | AACGCTATTCGCCAGCTTGC    | [9]       |
| ArpA1.r                                               |                             | TCTCCCCATACCGTACGCTA    |           |
| <b>5- Virulence genes</b>                             |                             |                         |           |
| ETEC                                                  | <i>lt</i>                   | GGCGACAGATTATACCGTGC    | [10]      |
|                                                       |                             | CGGTCTCTATATTCCCTGTT    |           |
|                                                       | <i>st</i>                   | ATTTTCTTTCTGTATTGTCTT   | [10]      |
|                                                       |                             | CACCCGGTACAAGCAGGATT    |           |
| EPEC                                                  | <i>bfpA</i>                 | AATGGTGCTTGCGCTTGCTGC   | [10]      |
|                                                       |                             | GCCGCTTTATCCAACCTGGTA   |           |
|                                                       | <i>eaeA</i>                 | GACCCGGCACAAGCATAAGC    | [10]      |
|                                                       |                             | CCACCTGCAGCAACAAGAGG    |           |
| STEC                                                  | <i>stx1</i>                 | CTGGATTTAATGTCGCATAGTG  | [10]      |
|                                                       |                             | AGAACGCCCACTGAGATCATC   |           |
|                                                       | <i>stx2</i>                 | GGCACTGTCTGAAACTGCTCC   | [10]      |
|                                                       |                             | TCGCCAGTTATCTGACATTCTG  |           |
| EIEC                                                  | <i>ial</i>                  | GGTATGATGATGATGAGTCCA   | [10]      |
|                                                       |                             | GGAGGCCAACAATTATTTCC    |           |
| <b>6- ERIC-PCR</b>                                    |                             |                         |           |
| ERIC2                                                 | ERIC                        | AAGTAAGTGACTGGGGTGAGCG  | [11]      |

## References

1. Weill, F.X.; Demartin, M.; Tande, D.; Espie, E.; Rakotoarivony, I.; Grimont, P.A. SHV-12-like extended-spectrum-beta-lactamase-producing strains of *Salmonella enterica* serotypes Babelsberg and Enteritidis isolated in France among infants adopted from Mali. *J. Clin. Microbiol.* **2004**, *42*, 2432–2437, <https://doi.org/10.1128/JCM.42.6.2432-2437.2004>.
2. Ahmed, A.M.; Motoi, Y.; Sato, M.; Maruyama, A.; Watanabe, H.; Fukumoto, Y.; Shimamoto, T. Zoo animals as reservoirs of gram-negative bacteria harboring integrons and antimicrobial resistance genes. *Appl. Environ. Microbiol.* **2007**, *73*, 6686–6690, <https://doi.org/10.1128/AEM.01054-07>.
3. Bonnet, R.; Sampaio, J.L.; Labia, R.; De Champs, C.; Sirot, D.; Chanal, C.; Sirot, J. A novel CTX-M  $\beta$ -lactamase (CTX-M-8) in cefotaxime-resistant *Enterobacteriaceae* isolated in Brazil. *Antimicrob. Agents Chemother.* **2000**, *44*, 1936–1942, <https://doi.org/10.1128/aac.44.7.1936-1942.2000>.
4. Briñas, L.; Zarazaga, M.; Saenz, Y.; Ruiz-Larrea, F.; Torres, C.  $\beta$ -lactamases in ampicillin-resistant *Escherichia coli* isolates from foods, humans, and healthy animals. *Antimicrob. Agents Chemother.* **2002**, *46*, 3156–3163, <https://doi.org/10.1128/aac.46.10.3156-3163.2002>.
5. Fevre, C.; Jbel, M.; Passet, V.; Weill, F.X.; Grimont, P.A.; Brisse, S. Six groups of the OXY  $\beta$ -lactamase evolved over millions of years in *Klebsiella oxytoca*. *Antimicrob. Agents Chemother.* **2005**, *49*, 3453–3462, <https://doi.org/10.1128/AAC.49.8.3453-3462.2005>.
6. Cattoir, V.; Poirel, L.; Rotimi, V.; Soussy, C.J.; Nordmann, P. Multiplex PCR for detection of plasmid-mediated quinolone resistance *qnr* genes in ESBL-producing enterobacterial isolates. *J. Antimicrob. Chemother.* **2007**, *60*, 394–397, <https://doi.org/10.1093/jac/dkm204>.
7. Robicsek, A.; Jacoby, G.A.; Hooper, D.C. The worldwide emergence of plasmid-mediated quinolone resistance. *Lancet Infect. Dis.* **2006**, *6*, 629–640, [https://doi.org/10.1016/S1473-3099\(06\)70599-0](https://doi.org/10.1016/S1473-3099(06)70599-0).
8. Ng, L.K.; Martin, I.; Alfa, M.; Mulvey, M. Multiplex PCR for the detection of tetracycline resistant genes. *Mol. Cell Probes* **2001**, *15*, 209–215, <https://doi.org/10.1006/mcpr.2001.0363>.
9. Clermont, O.; Christenson, J.K.; Denamur, E.; Gordon, D.M. The Clermont *Escherichia coli* phylo-typing method revisited: Improvement of specificity and detection of new phylo-groups. *Environ. Microbiol. Rep.* **2013**, *5*, 58–65, <https://doi.org/10.1111/1758-2229.12019>.
10. López-Saucedo, C.; Cerna, J.F.; Villegas-Sepulveda, N.; Thompson, R.; Velazquez, F.R.; Torres, J.; Tarr, P.I.; Estrada-Garcia, T. Single multiplex polymerase chain reaction to detect diverse loci associated with diarrheagenic *Escherichia coli*. *Emerg. Infect. Dis.* **2003**, *9*, 127–131, <https://doi.org/10.3201/eid0901.010507>.
11. Versalovic, J.; Koeuth, T.; Lupski, J.R. Distribution of repetitive DNA sequences in eubacteria and application to fingerprinting of bacterial genomes. *Nucleic Acids Res.* **1991**, *19*, 6823–6831, <https://doi.org/10.1093/nar/19.24.6823>.
